# Supplementary material for: Improvement of the thermoelectric properties of a MoO 3 monolayer through oxygen vacancies
Source: publisher site journal article supplement (doi:10.3762/bjnano.10.199), 2019-10-25
Supplement: Additional file 1 [file 2190-4286-10-199-S1.pdf]

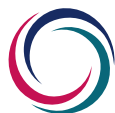

## Supporting Information

for

### **Improvement of the thermoelectric properties of a MoO<sub>3</sub> monolayer through oxygen vacancies**

Wenwen Zheng, Wei Cao, Ziyu Wang, Huixiong Deng, Jing Shi and Rui Xiong

*Beilstein J. Nanotechnol.* **2019**, *10*, 2031–2038. doi:10.3762/bjnano.10.199

### **Crystal structures of MoO<sub>3</sub> with oxygen vacancies**

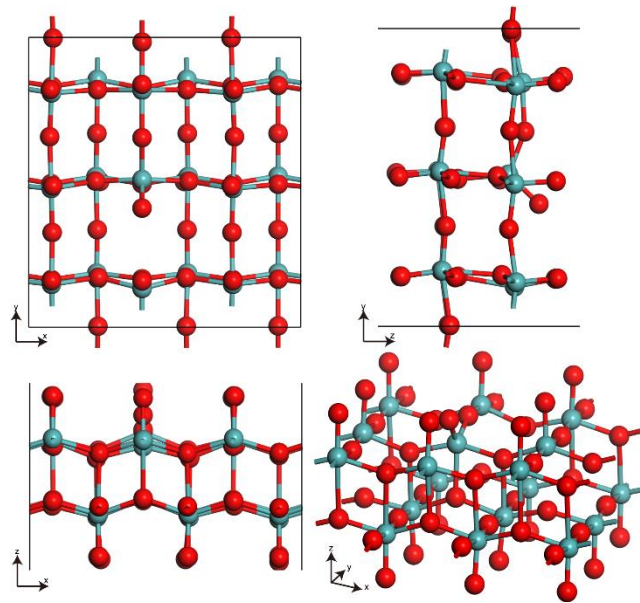

**Figure S1:** Optimized structure of MoO<sub>3</sub> monolayer with O1 vacancy. The red spheres represent O atoms and the green represent Mo atoms.

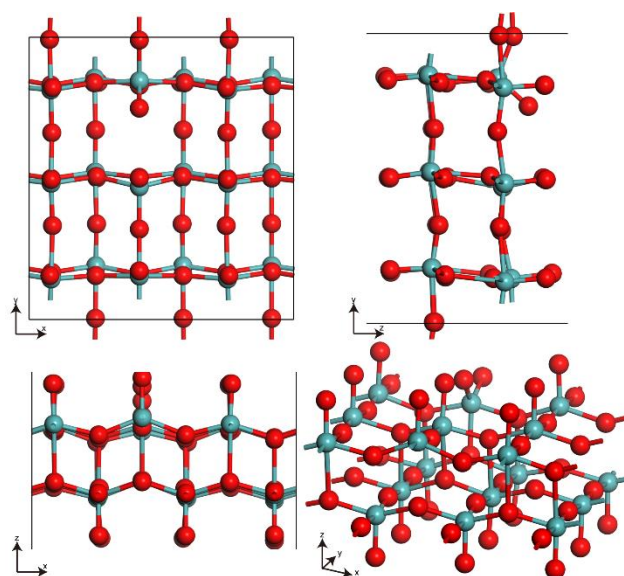

**Figure S2:** Optimized structure of MoO<sub>3</sub> monolayer with O<sub>2</sub> vacancy. The red spheres represent O atoms and the green represent Mo atoms.

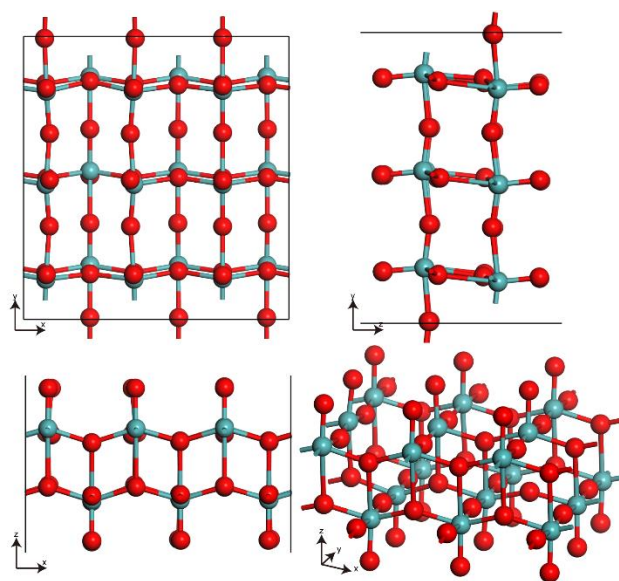

**Figure S3:** Optimized structure of MoO<sub>3</sub> monolayer with O<sub>3</sub> vacancy. The red spheres represent O atoms and the green represent Mo atoms.
